# Supplementary material
Source: publisher figshare collection journal article supplement (https://acs.figshare.com/ndownloader/files/23454245)
Supplement: Supplementary file 1 [file 23454245]

# Supporting information

## Annealed Cobalt-Carbon Nanocomposites for Room-Temperature Spintronic Applications

Marcos V. Puydinger dos Santos,<sup>¥,\*</sup> Jeovani Brandão,<sup>‡</sup> Danian A. Dugato,<sup>‡,§</sup> Fanny Béron,<sup>¥</sup> Kleber R. Pirota,<sup>¥</sup> and Ivo Utke<sup>†,\*</sup>

\*E-mail: [puyding@ifi.unicamp.br](mailto:puyding@ifi.unicamp.br)

[ivo.utke@empa.ch](mailto:ivo.utke@empa.ch)

<sup>¥</sup>Institute of Physics Gleb Wataghin, University of Campinas, 13083-859 Campinas-SP, Brazil.

<sup>‡</sup>Synchrotron National Laboratory (LNLS), National Center for Research in Energy and Materials, Campinas, São Paulo 13083-970, Brazil.

<sup>§</sup>Department of Physics, University of Santa Maria, 97105-900 Santa Maria RS, Brazil.

<sup>†</sup>EMPA, Swiss Federal Laboratories for Materials Science and Technology, Laboratory for Mechanics of Materials and Nanostructures, Feuerwerkerstrasse 39, 3602 Thun, Switzerland.

### ***Suppl. 1 – Profile of the deposits***

The profiles of our as-grown and 300 °C annealed deposits were taken using atomic force microscopy (AFM). Figure S1 presents the overlapped profiles with thicknesses of around 28 and 30 nm, respectively. The cross-sectional area of the as-deposited material has decreased around

10% upon annealing at 300 °C during 10 minutes, which is consistent with our previous work using the  $\text{Co}_2(\text{CO})_8$  precursor.<sup>1</sup>

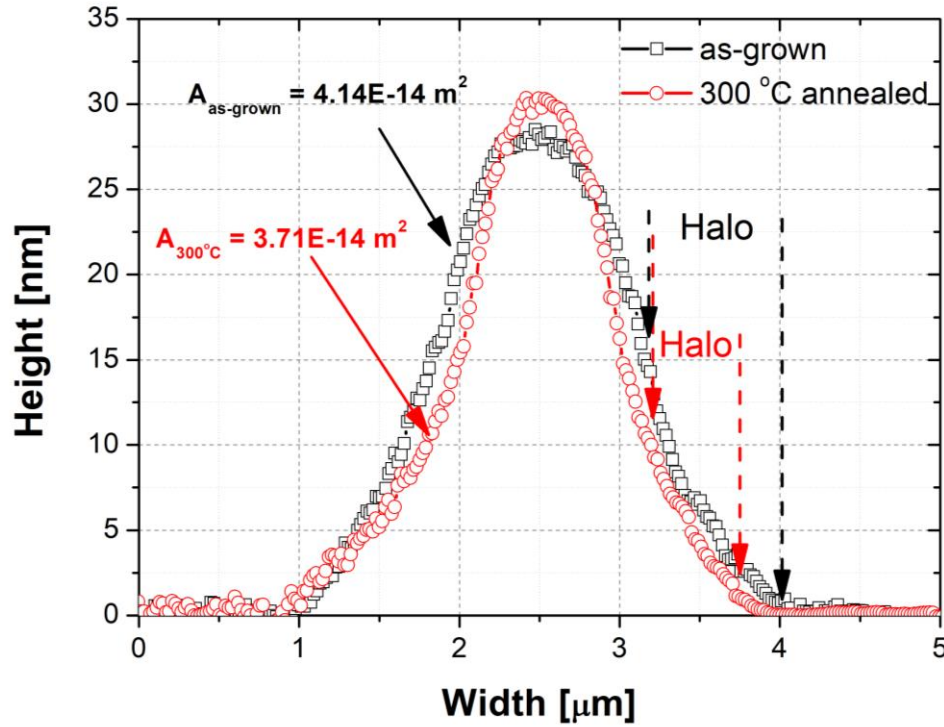

**Figure S1.** Profiles of the as-grown and 300 °C annealed deposits from  $\text{Co}_2(\text{CO})_8$  taken from AFM. The halo surrounding each wire is indicated. A slight shrinkage of the halo was observed upon annealing.

### ***Suppl. 2 – MFM analysis***

Figure S2 shows the MFM images of the 80 nm-thick as-deposited and 300 °C annealed discs with 8  $\mu\text{m}$  in diameter. The non-rectangular shape of the hysteresis cycle shown in Figure 2(a) of the manuscript may be attributed to the nucleation and irreversible annihilation of vortices during the magnetization reversal process in a multidomain structure. Moreover, the grainy domain structure presented in Figure 4(d) for the rectangular deposit is also observed in the annealed disc.

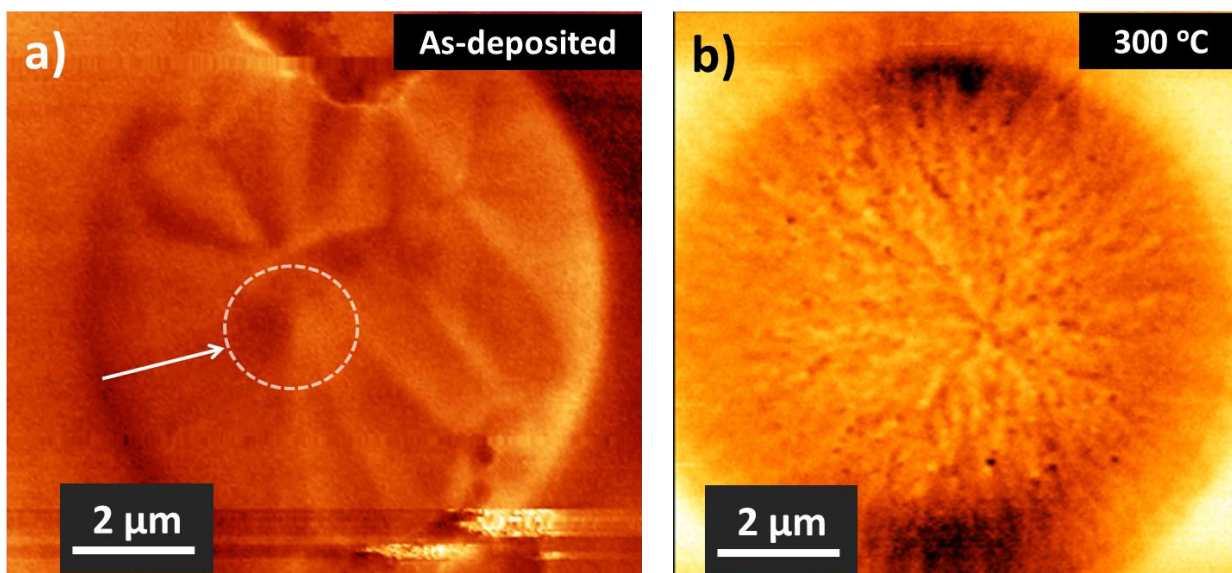

**Figure S2.** MFM images of the (a) as-deposited (54 at. % Co) and (b) 300 °C annealed (85 at.% Co) discs at remanence. The dashed circle in (a) shows one possible vortex surrounded by relatively large multidomain walls.

Figure S3 shows a  $2 \times 2 \mu\text{m}^2$  MFM image in the center of our wire and it turns out to be formed by round-shaped granular distribution of domains. This image enhances the presence of both dark and bright spots, indicating a local perpendicular magnetic anisotropy (PMA) of granular structures of deposited Co-C.

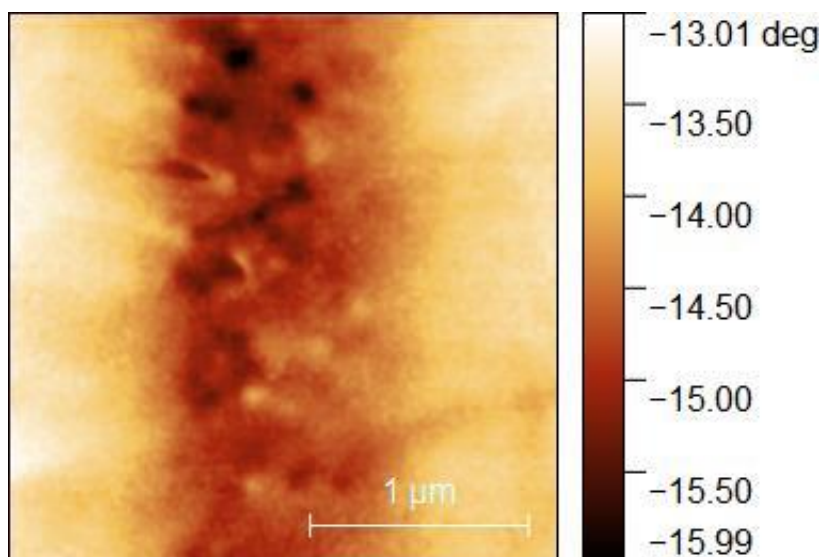

**Figure S3.** MFM image taken in the central part of the 300 °C annealed FEBID nanowire showing the round-shaped magnetic domains (bright and dark spots).

### ***Suppl. 3 – Magnetic domain grain analysis***

The magnetic domain structure of the 300 °C annealed nanowire shown in Figure 4(d) of the manuscript represents a complex well-defined round-shaped granular distribution of domains. The average size of those grains ( $58 \pm 24$  nm) were measured using ImageJ.<sup>3</sup> We measured the full width at half maximum (FWHM) of the profile of 20 different grains before adjusting the experimental distribution using the conventional Gaussian model (Figure S4).

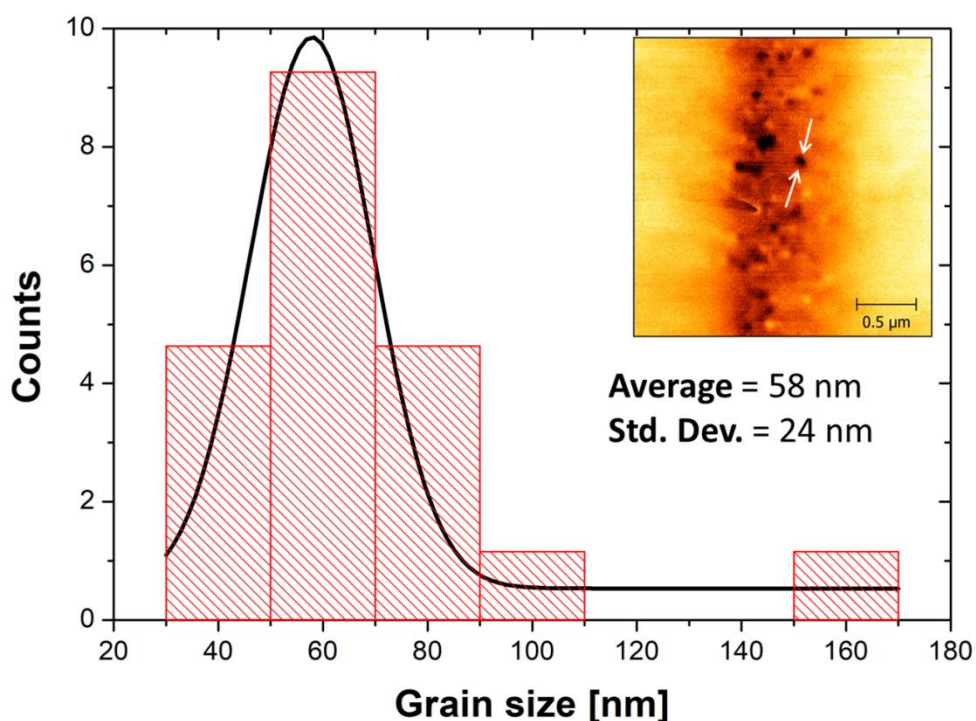

**Figure S4.** Magnetic grain size distribution observed in the MFM image of the 300 °C annealed material from  $\text{Co}_2(\text{CO})_8$  (inset). We found an average size of  $58 \pm 24$  nm from the Gaussian distribution.

### ***References***

- (1) Puydinger dos Santos, M. V.; Velo, M. F.; Domingos, R. D.; Zhang, Y.; Maeder, X.; Guerra-Nuñez, C.; Best, J. P.; Béron, F.; Pirota, K. R.; Moshkalev, S.; Diniz, J. A.; Utke, I.

Annealing-Based Electrical Tuning of Cobalt–Carbon Deposits Grown by Focused-Electron-Beam-Induced Deposition. *ACS Appl. Mater. Interfaces* **2016**, 8 (47), 32496–32503.

(2) Genoni, P.; Genuzio, F.; Menteş, T. O.; Santos, B.; Sala, A.; Lenardi, C.; Locatelli, A. Magnetic Patterning by Electron Beam-Assisted Carbon Lithography. *ACS Appl. Mater. Interfaces* **2018**, 10 (32), 27178–27187.

(3) Schneider, C. A.; Rasband, W. S.; Eliceiri, K. W. NIH Image to ImageJ: 25 Years of Image Analysis. *Nat. Methods* **2012**, 9 (7), 671–675.
